# Supplementary material for: Synthesis and DNA binding properties of novel benzo[b]isoquino[2,3-h]-naphthyridines
Source: Royal Society of Chemistry journal article supplement (doi:10.1039/b503281d), 2005-01-01
Supplement: b503281d.pdf [file b503281d.pdf]

## Supplementary material

**Table S1** Coupling constant values for the B and C rings of benzo[*b*]isoquino[2,3-*h*]-naphthyridines<sup>a</sup>

| J(H, H)                                               | 7a   | 9    | 9 <sup>b</sup> | 10a  |          | 7b   | 10b              |          |
|-------------------------------------------------------|------|------|----------------|------|----------|------|------------------|----------|
| 5ax, 5eq                                              | 15.2 | 15.3 | 15.7           | 15.3 |          | 15.2 | 15.1             |          |
| 7ax, 7eq                                              | 11.6 | 11.6 | 12.5           | 11.6 |          | 11.4 | 11.5             |          |
| 8ax, 8eq                                              | 13.2 | 13.3 | 14.5           | 13.3 |          | 13.0 | 13.1             |          |
| 7ax, 8ax                                              | 12.6 | 12.8 | 13.5           | 12.8 |          | 12.4 | 12.2             |          |
| 7ax, 8eq                                              | 3.2  | 3.3  | 3.6            | 3.3  |          | 2.6  | 2.5 <sup>c</sup> |          |
| 7eq, 8ax                                              | 4.1  | 4.1  | 4.4            | 4.1  |          | 3.8  | 3.8              |          |
| 7eq, 8eq                                              | 3.0  | 2.7  | 2.1            | 2.9  |          | 3.0  | 3.0              |          |
| 8a, 8ax                                               | 12.5 | 12.3 | 12.5           | 12.4 | (ax, ax) | 12.3 | 12.3             | (ax, ax) |
| 8a, 8eq                                               | 3.2  | 3.4  | 4.0            | 3.2  | (ax, eq) | 3.3  | 3.3              | (ax, eq) |
| 8a, 14a                                               | 3.2  | 3.1  | 3.0            | 3.2  | (ax, eq) | 10.6 | 10.7             | (ax, ax) |
| 14a, 14b                                              | 2.1  | 2.3  | 1.7            | 2.0  | (eq, ax) | 8.5  | 8.5              | (ax, ax) |
| 14a, NH <sup>c, d, e</sup>                            | 1.5  | ~1.5 |                | ~2.0 |          | ≤0.5 | 0.7              |          |
| 14b, 15ax                                             | 11.3 | 11.3 | 11.8           | 11.3 | (ax, eq) | 10.5 | 10.5             | (ax, eq) |
| 14b, 15eq                                             | 4.7  | 4.8  | 5.4            | 4.8  | (ax, eq) | 4.3  | 4.3              | (ax, eq) |
| 15ax, 15eq                                            | 16.7 | 16.7 | 17.6           | 16.7 |          | 15.9 | 15.9             |          |
| <sup>5</sup> J(5ax, 15ax) <sup>c, d</sup>             | 1.0  | 1.1  | <sup>f</sup>   | 1.1  |          | 1.2  | 1.3              |          |
| <sup>4</sup> J(8eq, 14 <sup>o</sup> ) <sup>c, d</sup> | 1.2  | 1.3  | ~1.0           | 1.3  |          | Zero | zero             |          |
| <sup>4</sup> J(8 <sup>o</sup> , NH) <sup>c, d</sup>   | 1.3  | 1.5  |                | ≤1.2 |          | Zero | zero             |          |

<sup>a</sup> Measured in Hz by 1D experiments, solvent CDCl<sub>3</sub>, estimated accuracy within ± 0.05 Hz, unless otherwise specified. <sup>b</sup> In D<sub>2</sub>O. <sup>c</sup> Estimated accuracy ± 0.1 Hz.

<sup>d</sup> Proved by decoupling experiments. <sup>e</sup> These values may be affected by exchange due to the small amount of acid present in the unstabilized CDCl<sub>3</sub>. <sup>f</sup> Not detected.

**Table S2** <sup>1</sup>H Chemical shift assignments (δ) for **9**, **10a** and **10b** with shift variation (Δδ) in presence of oligonucleotides<sup>a</sup>

|                  | δ        | Δδ            | δ          | Δδ              | Δδ              | δ          | Δδ                          | Δδ              | Δδ              | Δδ              |
|------------------|----------|---------------|------------|-----------------|-----------------|------------|-----------------------------|-----------------|-----------------|-----------------|
|                  | <b>9</b> | <b>9/AATT</b> | <b>10a</b> | <b>10a/AATT</b> | <b>10a/GATC</b> | <b>10b</b> | <b>10b/GATC<sup>c</sup></b> | <b>10b/ACGT</b> | <b>10b/CGCG</b> | <b>10b/AATT</b> |
| H-1 <sup>b</sup> | 7.37     | -0.10         | 7.37       | -0.10           | -0.06           | 7.32       | -0.11                       | -0.21           | -0.12           | -0.05           |
| H-2 <sup>b</sup> | 7.39     | -0.12         | 7.37       | -0.10           | -0.06           | 7.32       | -0.11                       | -0.14           | -0.12           | -0.05           |
| H-3 <sup>b</sup> | 7.34     | -0.10         | 7.33       | -0.11           | -0.06           | 7.28       | -0.10                       | -0.10           | -0.12           | -0.04           |
| H-4 <sup>b</sup> | 7.22     | -0.10         | 7.25       | -0.10           | -0.05           | 7.18       | -0.11                       | -0.08           | -0.11           | -0.05           |
| H-5eq            | 4.52     | -0.20         | 4.40       | -0.18           | -0.09           | 4.28       | -0.17                       | -0.18           | -0.20           | -0.07           |
| H-5ax            | 4.38     | -0.15         | 4.15       | -0.12           | -0.10           | 3.95       | -0.14                       | -0.15           | -0.16           | -0.08           |
| H-7eq            | 3.70     | -0.10         | 3.55       | -0.10           | -0.08           | 3.55       | -0.10                       | -0.12           | -0.12           | -0.06           |
| H-7ax            | 3.25     | -0.11         | 3.00       | -0.09           | -0.07           | 2.97       | -0.09                       | -0.10           | -0.11           | -0.05           |
| H-8eq            | 2.00     | -0.15         | 1.94       | -0.09           | -0.06           | 2.18       | -0.12                       | -0.15           | -0.14           | -0.04           |
| H-8ax            | 1.44     | -0.04         | 1.47       | -0.05           | -0.02           | 1.60       | -0.07                       | -0.07           | -0.08           | -0.02           |
| H-8a             | 2.05     | -0.20         | 1.97       | ≤-0.12          | -0.04           | 1.68       | -0.18                       | -0.20           | -0.21           | -0.04           |
| H-10             | 7.94     | -0.10         | 7.76       | -0.09           | -0.07           | 7.80       | -0.09                       | -0.12           | -0.12           | -0.07           |
| H-12             | 7.74     | -0.15         | 7.55       | -0.11           | -0.09           | 7.47       | -0.10                       | -0.15           | -0.14           | -0.09           |
| H-13             | 6.78     | -0.10         | 6.82       | -0.12           | -0.07           | 6.79       | -0.11                       | -0.12           | -0.11           | -0.07           |
| H-14a            | 4.13     | -0.20         | 4.04       | -0.14           | -0.10           | 3.54       | -0.15                       | -0.18           | -0.18           | -0.08           |
| H-14b            | 3.81     | -0.10         | 3.52       | -0.11           | -0.09           | 3.25       | -0.10                       | -0.12           | -0.12           | -0.08           |
| H-15ax           | 3.48     | -0.09         | 3.45       | -0.08           | -0.08           | 2.84       | -0.10                       | -0.11           | -0.10           | -0.06           |
| H-15eq           | 3.22     | -0.07         | 3.14       | ≤-0.1           | -0.06           | 3.54       | -0.09                       | -0.10           | -0.12           | -0.05           |
| 9-Me             | 1.44     | -0.04         | 1.47       | -0.04           | -0.03           | 1.42       | -0.03                       | -0.05           | -0.04           | -0.03           |
| 9-Me             | 1.27     | -0.05         | 1.31       | -0.05           | -0.05           | 1.17       | -0.04                       | -0.04           | -0.03           | -0.03           |
| OCH <sub>2</sub> | 4.64     | -0.08         | 3.75       | -0.10           | -0.08           | 3.74       | -0.09                       | -0.10           | -0.10           | -0.04           |
| NCH <sub>2</sub> | 3.62     | -0.22         | 3.53       | -0.18           | -0.07           | 3.48       | -0.15                       | -0.18           | -0.19           | -0.05           |
| N-Me             | 3.00     | -0.20         |            |                 |                 |            |                             |                 |                 |                 |

<sup>a</sup> Measured at 20°C in D<sub>2</sub>O, pH 5.9-6.0, 0.02 M NaCl, R = [drug]/ [DNA] = 1,  $\delta_{\text{free}}$  were measured at the concentration of 10<sup>-5</sup> M. AATT is d(AAGAATTCTT)<sub>2</sub>, GATC is d(GCGATCGC)<sub>2</sub>, ACGT is d(CGACGTCG)<sub>2</sub>, CGCG is d(GCATCGCGATGC)<sub>2</sub>.

<sup>b</sup> Assigned by ROESY experiments. <sup>c</sup> In H<sub>2</sub>O/D<sub>2</sub>O (90:10) at 5°C the NH signals are: A4:T5 13.44 (free), 13.35 (bound); C2:G7 12.89 (free), 12.77 (bound); G3:C6 12.59 (free), 12.48 (bound); G1:C8 12.94 (free), ca. 12.6-12.7 (bound).

**Table S3** <sup>31</sup>P Chemical shift values ( $\delta$ ) for the phosphates of d(AAGAATTCTT)<sub>2</sub> free and bound to **10a**<sup>a</sup>

|                                 | Free<br>$\delta$ | Bound<br>$\Delta$ | $\Delta\delta^b$ |
|---------------------------------|------------------|-------------------|------------------|
| A <sub>1</sub> pA <sub>2</sub>  | -1.31            | -1.26             | +0.05            |
| A <sub>2</sub> pG <sub>3</sub>  | -1.00            | -0.98             | +0.02            |
| G <sub>3</sub> pA <sub>4</sub>  | -1.14            | -1.21             | -0.07            |
| A <sub>4</sub> pA <sub>5</sub>  | -1.40            | -1.35             | +0.06            |
| A <sub>5</sub> pT <sub>6</sub>  | -1.37            | -1.46             | -0.09            |
| T <sub>6</sub> pT <sub>7</sub>  | (-1.18)          | -1.14             | +0.04            |
| T <sub>7</sub> pC <sub>8</sub>  | (-1.11)          | -1.14             | -0.05            |
| C <sub>8</sub> pT <sub>9</sub>  | (-1.14)          | -1.14             | 0.00             |
| T <sub>9</sub> pT <sub>10</sub> | (-1.04)          | -1.14             | -0.04            |

<sup>a</sup> Spectra measured at 20°C in ppm from methylenediphosphonic acid (MDA), as external reference, solvent D<sub>2</sub>O, pH 5.8, 0.02 M NaCl. Similar values in parentheses may be interchanged. For the assignments see Ref. 8.

<sup>b</sup>  $\Delta\delta = \delta_{\text{bound}} - \delta_{\text{free}}$
